# Supplementary material for: Formulating causal questions and principled statistical answers
Source: PubMed Central journal article supplement (PMC7756489; doi:10.1002/sim.8741), 2020-09-23
Supplement: SIM-39-4922-s001.pdf [file SIM-39-4922-s001.pdf]

# Appendix 1 — Generation of the *simulation learner* PROBITsim

## 1 Introduction

In the companion paper we discuss the estimation and interpretation of various estimands using simulated data. The generation of these data was informed by a real investigation but enriched here by the generation of potential outcome data, in addition to factual data. We follow Wallace et al (2015) in simulating data inspired by the results of the Promotion of Breastfeeding Intervention Trial (PROBIT) (Kramer et al, 2001). In this trial mother-infant pairs across 31 Belarusian maternity hospitals were cluster randomised to receive either standard care or a breastfeeding encouragement intervention to investigate the effect of breastfeeding on a child’s later development. In our simulation we are randomising individual mother-infant pairs and are focusing on weight achieved at age 3 months, thus the study population is babies that survive the first three months.

The DAG in Figure 1 sketches the underlying causal relationships between the simulated variables.

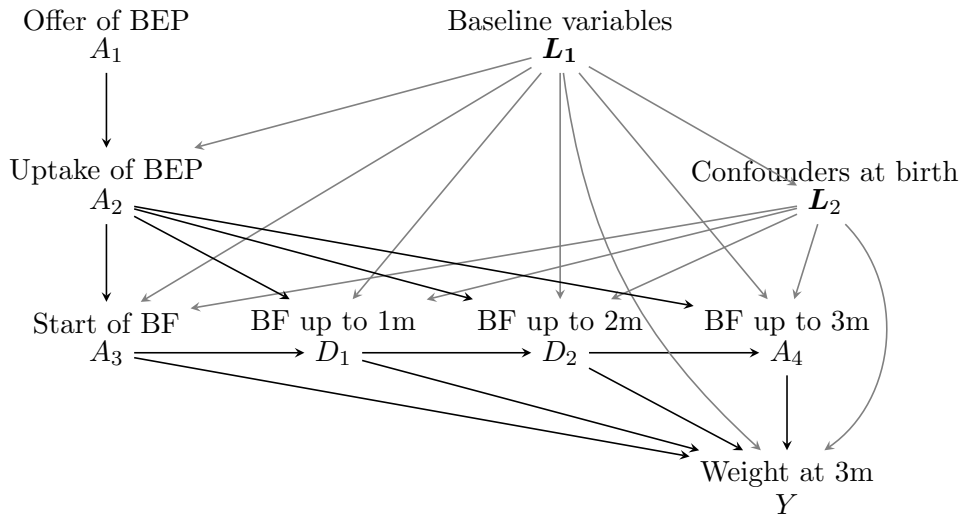

Figure 1: Causal diagram of the data generating model for the Simulation Learner. BEP: breastfeeding encouragement programme; BF: breastfeeding; m: months

In the next sections we describe the models we used to simulate the data, called PROBITsim.

## 2 The baseline variables

The distribution of baseline variables,  $L$ , was made to resemble that of the Belarus study. In all simulations, binary variables were generated from the binomial distribution, and categorical variables with more than two categories were generated using a multinomial distribution.

- The sample size  $n$  is set to be 17,044.
- Women can live at four different locations (1: urban western region, 2: rural western region, 3: urban, eastern region and 4: rural, eastern region) with frequency distribution (0.33,0.16,0.26,0.25).
- Age is assumed to be log normal  $\log(\text{age}) \sim N(3.17, 0.19)$ . If the simulated age  $\leq 13$  years, it is set to be 13 years. This yields a median age of 24 years (interquartile range 21-27 years).
- The child's sex (Sex) is a binary variable. Boys are coded as 1, girls as 0. The probability to be male is 52%.
- Education (Educ) had 3 levels (1=low, 2=medium, 3=high). Its distribution depends on the location, according to the Belarus study, where the probability of having low, medium or high education is set as:
  - at location 1: low: 0.31, medium 0.54, high 0.15
  - at location 2: low: 0.44, medium 0.44, high 0.12
  - at location 3: low: 0.33, medium 0.51, high 0.16
  - at location 4: low: 0.41, medium 0.48, high 0.11
- There are several baseline variables that depend on education level:
  - Smoking during pregnancy (Smoke) is a binary variable, with probability of a positive value set to be equal to 0.40 for low education, 0.25 for medium education and 0.10 for more highly educated women.
  - Maternal allergy (Allergy) is a binary variable. The probability of having a mother member who suffers from allergy is 0.03 for low education, 0.05 for medium education and 0.07 for more highly educated women.
  - Born by caesarian section (Caesarean) is a binary variable. The probability of a caesarean birth is set to be equal to 0.10 for mothers with low education, 0.12 for medium education and 0.16 for more highly educated women.
- Birth weight (Wgt0) is normally distributed and its mean (E) depends on the child's sex, maternal smoking and education. The standard deviation (SD) is set to be larger for boys than for girls.

$$E(\text{Wgt0}) = 2950 + 140 \text{ Sex} + 80 (\text{Educ}=2) + 160 (\text{Educ}=3) - 200 \text{ Smoke}$$

$$SD(\text{Wgt0}) = 390 + 30 \text{ Sex}$$

where we use the shorthand ( $X = x$ ) for  $I_{(X=x)}$ , the indicator that the statement within parentheses is true.

Table 2 provides a summary of these data.

### 3 Potential and observed exposures

We consider a randomised trial where randomly half of the pregnant women received an intervention that consisted of an offer for a breastfeeding encouragement programme. We assume that only women in the intervention group have access to the encouragement programme. In this study, we distinguish four different exposure types of interest:

- $A_1 = 1$ : being assigned to the intervention group, in which the encouragement programme is offered;  $A_1 = 0$ : otherwise.

- $A_2 = 1$ : actually taking up the training offer (e.g. a course followed, literature read);  
 $A_2 = 0$ : otherwise.
- $A_3 = 1$ : starting breastfeeding; ,  $A_3 = 0$ : otherwise.
- $A_4 = 1$ : starting breastfeeding and continuing for the full 3 months; ,  $A_4 = 0$ : otherwise.

For each woman in the study, we generated potential exposure values for  $A_2$ ,  $A_3$  and  $A_4$  when setting  $A_1$  (and in some instances  $A_2$ ) to be 1 or to 0. The following potential exposures were generated: .

- $A_{2,\mathbf{a}_1(1)}$  and  $A_{2,\mathbf{a}_1(0)}$ , where  $A_{2,\mathbf{a}_1(1)}$  represents the potential exposure  $A_2$  when  $A_1$  is set to take the value 1, and similarly for  $A_{2,\mathbf{a}_1(0)}$ . These potential exposures indicate whether the training programme would be taken up, had  $A_1$  been set to be 1 or 0.
- $A_{3,\mathbf{a}_1(1)}$  and  $A_{3,\mathbf{a}_1(0)}$ . They indicate whether breastfeeding would be initiated if the breastfeeding programme had been offered ( $A_1$  set to 1 being denoted  $\mathbf{a}_1(1)$ ) or not ( $\mathbf{a}_1(0)$ ).
- $A_{3,\mathbf{a}_2(1)}$ ,  $A_{3,\mathbf{a}_2(0)}$ . They indicate whether breastfeeding would be initiated and continued for 3 months, had  $A_2$ , the training, been set to be 0 or 1.

Because we assumed that the programme is only available to women in the intervention group, women in the control group have no access to it, i.e.  $A_{2,\mathbf{a}_1(0)} = 0$  for all women. This also implies that  $A_{3,\mathbf{a}_1(0)} = A_{3,\mathbf{a}_2(0)}$ .

The next sections describe how these potential exposure realisations and the observed data were generated.

### 3.1 $A_1$ : randomised intervention

In our simulation women are randomly assigned to receive the offer of the breastfeeding encouragement programme (BEP), or standard care.

- The intervention ( $A_1$ ) is a binary variable with  $Pr(A_1 = 1) = 0.50$ .

### 3.2 $A_2$ : the programme offer is actually taken up

When the programme is offered, a subgroup of women will take up the invitation and will actually follow the programme. We assume that the more highly educated women are more inclined to follow the programme. For each woman we generated the potential variable  $A_{2,\mathbf{a}_1(1)}$  indicating whether the woman would have followed the programme had she been randomised to the intervention arm. We use a logistic regression model to relate the odds of following the programme to maternal age, education and smoking status during pregnancy as follows:

$$Pr(A_{2,\mathbf{a}_1(1)} = 1) = \text{expit}(-1.9 + 0.1 \text{ Age} + 0.5 (\text{Educ} = 2) + 1.0 (\text{Educ} = 3) - 1.0 \text{ Smoke}).$$

The potential variable  $A_{2,\mathbf{a}_1(0)}$  is 0 for all women because it is only possible to follow the programme after receiving an invitation for it (i.e. when  $A_1=1$ ).

Assuming that the consistency assumption holds, the observed treatment  $A_2$  is then

$$A_2 = \begin{cases} A_{2,\mathbf{a}_1(1)} & \text{if } A_1 = 1 \\ 0 & \text{if } A_1 = 0 \end{cases}$$

### 3.3 $A_3$ : the mother actually starts breastfeeding

We generated an ordinal variable  $X$ , representing an unmeasurable individual characteristic, to distinguish three different types of women: women who would always start breastfeeding whether the BEP is offered or not ( $X = 2$ ), women who would start breastfeeding after following the encouragement programme, but would not, if the programme were not followed ( $X=1$ ), and women who would never start breastfeeding ( $X = 0$ ). This variable is used to generate the potential breastfeeding behaviour under different values of the intervention and potential programme uptake but will be treated as an unobservable individual characteristic (and referred to as “principal strata”). We assume that there are no women who will not breastfeed after following the programme, but will start breastfeeding, without following the programme, i.e. there are no defiers and the assumption of monotonicity holds.

The ordinal variable  $X$  was generated using an ordinal logistic model with:

- $Pr(X = 2) = \text{expit}(-2.5 + 0.25 (\text{Educ} = 2) + 0.5 (\text{Educ} = 3) + 0.1 \text{ Age} + 0.008 \text{ Sex} - 0.5 \text{ Smoke} + 0.0006 \text{ Wgt0})$ .
- $Pr(X \geq 1) = \text{expit}(1.5 + \text{logit}(\text{Pr}(X=2)))$

This ordinal variable  $X$  was used to obtain the third treatment variable  $A_3$ . Three potential treatment outcomes were generated:  $A_{3,\mathbf{a}_1(1)}$  indicating whether a woman would start breastfeeding if randomised to the intervention arm,  $A_{3,\mathbf{a}_1(0)}$  whether she would start breastfeeding if randomised to the control arm, and  $A_{3,\mathbf{a}_2(1)}$ , if she would start breastfeeding after following the programme. We assume that only women with  $A_{2,\mathbf{a}_1(1)} = 1$ , i.e the women who would follow the programme if offered, could also be *compliers* to starting breastfeeding.

- $A_{3,\mathbf{a}_1(1)} = 1$  if  $X = 2$  or  $X = 1$  and  $A_{2,\mathbf{a}_1(1)} = 1$ , 0 otherwise
- $A_{3,\mathbf{a}_1(0)} = 1$  if  $X = 2$ , 0 otherwise
- $A_{3,\mathbf{a}_2(1)} = 1$  if  $X = 2$  or  $X = 1$ , 0 otherwise
- $A_{3,\mathbf{a}_2(0)} = 1$  if  $X = 2$ , 0 otherwise

Because we assumed that women in the control group had no access to the encouragement programme,  $A_{3,\mathbf{a}_1(0)} = A_{3,\mathbf{a}_2(0)}$  for all women.

The observed treatment  $A_3$  is then

$$A_3 = \begin{cases} A_{3,\mathbf{a}_1(1)} & \text{if } A_1 = 1 \\ A_{3,\mathbf{a}_1(0)} & \text{if } A_1 = 0 \end{cases}$$

Table 1 shows some of the data for the first 10 women. For example woman 1 has the intermediate level of education (‘medium’). She is randomised to intervention ( $A_1 = 1$ ), but because  $A_{2,\mathbf{a}_1(1)}$  is equal to 0 she does not actually follow the programme. The unmeasurable individual characteristic  $X$  was 0, indicating that the woman would not start breastfeeding either when randomised to the intervention or when randomised to control and so both  $A_{3,\mathbf{a}_1(1)}$  and  $A_{3,\mathbf{a}_1(0)}$  are 0. If counter to the facts she would have followed the programme, then she still would not have started breastfeeding ( $A_{3,\mathbf{a}_2(1)} = 0$ ) because  $X = 0$ . In practice we do not observe all these potential outcomes, but for this woman we observe  $A_2 = 0$  and  $A_3 = 0$ .

Figure 2 illustrates the data generating mechanism for  $A_2$  and  $A_3$ .

### 3.4 Description of the generated confounders and early exposure data

The following properties hold in our simulated population.

- The probability of following the programme when offered,  $\text{Pr}(A_{2,\mathbf{a}_1(1)} = 1) = 0.64$ .

Table 1: Generated potential exposure values of the first 10 women, PROBITsim Study.

|    | Educ | $A_1$ | $A_{2,\mathbf{a}_1(1)}$ | X | $A_{3,\mathbf{a}_1(1)}$ | $A_{3,\mathbf{a}_1(0)}$ | $A_{3,\mathbf{a}_2(1)}$ | $A_2$ | $A_3$ |
|----|------|-------|-------------------------|---|-------------------------|-------------------------|-------------------------|-------|-------|
| 1  | 2    | 1     | 0                       | 0 | 0                       | 0                       | 0                       | 0     | 0     |
| 2  | 2    | 1     | 0                       | 0 | 0                       | 0                       | 1                       | 0     | 0     |
| 3  | 1    | 1     | 0                       | 2 | 1                       | 1                       | 1                       | 0     | 1     |
| 4  | 3    | 1     | 0                       | 0 | 0                       | 0                       | 1                       | 0     | 0     |
| 5  | 2    | 1     | 0                       | 0 | 0                       | 0                       | 0                       | 0     | 0     |
| 6  | 2    | 0     | 0                       | 0 | 0                       | 0                       | 0                       | 0     | 0     |
| 7  | 3    | 0     | 1                       | 1 | 1                       | 0                       | 1                       | 0     | 0     |
| 8  | 1    | 1     | 1                       | 1 | 1                       | 0                       | 1                       | 1     | 1     |
| 9  | 2    | 1     | 1                       | 0 | 0                       | 0                       | 0                       | 1     | 0     |
| 10 | 2    | 0     | 1                       | 2 | 1                       | 1                       | 1                       | 0     | 1     |

Educ is education: 1=low, 2=medium, 3=high; X is the unmeasurable individual characteristic, which distinguishes the different principal strata (never breastfeeding (X=0), always breastfeeding (X=2), and only starting breastfeeding if ( $A_2 = 1$  and  $A_1 = 1$ ; X=1).

- The frequency distribution of the principal breastfeeding strata is 0.32 for never starters, 0.19 for compliers (they will start breastfeeding if randomised for the programme and not if they are in the control arm), 0.49 always starters.
- The probability of starting breastfeeding if randomised to control is  $Pr(A_{3,\mathbf{a}_1(0)} = 1) = 0.49$ .
- The probability of starting breastfeeding if randomised to intervention is  $Pr(A_{3,\mathbf{a}_1(1)} = 1) = 0.68$ .
- The probability of starting breastfeeding if the programme were followed by everyone  $Pr(A_{3,\mathbf{a}_2(1)} = 1) = 0.79$ .

Table 2: Mean of baseline variables in the different treatment groups, PROBITsim Study,  $N = 17,044$

| Variable     | Overall | Intervention group |                        |                        |                        |                        |                        | Control group |                        |                        |                        |
|--------------|---------|--------------------|------------------------|------------------------|------------------------|------------------------|------------------------|---------------|------------------------|------------------------|------------------------|
|              |         | $A_1 = 1$          | $A_1 = 1$<br>$A_2 = 1$ | $A_1 = 1$<br>$A_2 = 0$ | $A_1 = 1$<br>$A_3 = 1$ | $A_1 = 1$<br>$A_3 = 0$ | $A_1 = 1$<br>$A_4 = 1$ | $A_1 = 0$     | $A_1 = 0$<br>$A_3 = 1$ | $A_1 = 0$<br>$A_3 = 0$ | $A_1 = 0$<br>$A_4 = 1$ |
| Location= 1  | 0.33    | 0.32               | 0.33                   | 0.31                   | 0.33                   | 0.31                   | 0.33                   | 0.34          | 0.34                   | 0.34                   | 0.35                   |
| Location= 2  | 0.16    | 0.17               | 0.16                   | 0.17                   | 0.17                   | 0.17                   | 0.16                   | 0.16          | 0.17                   | 0.15                   | 0.17                   |
| Location= 3  | 0.26    | 0.26               | 0.26                   | 0.26                   | 0.27                   | 0.25                   | 0.27                   | 0.27          | 0.26                   | 0.27                   | 0.26                   |
| Location= 4  | 0.24    | 0.25               | 0.24                   | 0.26                   | 0.24                   | 0.28                   | 0.24                   | 0.23          | 0.23                   | 0.24                   | 0.22                   |
| Age          | 24.3    | 24.3               | 24.9                   | 23.1                   | 25.0                   | 22.7                   | 25.3                   | 24.3          | 25.3                   | 23.2                   | 25.6                   |
| Educ= low    | 0.36    | 0.36               | 0.3                    | 0.48                   | 0.32                   | 0.45                   | 0.25                   | 0.35          | 0.31                   | 0.39                   | 0.21                   |
| Educ= medium | 0.50    | 0.50               | 0.53                   | 0.45                   | 0.52                   | 0.46                   | 0.56                   | 0.51          | 0.52                   | 0.50                   | 0.57                   |
| Educ= high   | 0.14    | 0.14               | 0.17                   | 0.07                   | 0.16                   | 0.09                   | 0.19                   | 0.14          | 0.17                   | 0.11                   | 0.21                   |
| Smoke        | 0.27    | 0.27               | 0.19                   | 0.43                   | 0.21                   | 0.40                   | 0.18                   | 0.27          | 0.20                   | 0.34                   | 0.18                   |
| Allergy      | 0.04    | 0.04               | 0.05                   | 0.04                   | 0.04                   | 0.04                   | 0.05                   | 0.05          | 0.05                   | 0.04                   | 0.06                   |
| Caesarean    | 0.12    | 0.12               | 0.12                   | 0.11                   | 0.12                   | 0.11                   | 0.10                   | 0.12          | 0.13                   | 0.12                   | 0.09                   |
| Birth weight | 3028    | 3024               | 3049                   | 2979                   | 3070                   | 2927                   | 3111                   | 3032          | 3099                   | 2967                   | 3158                   |
| Sex          | 0.52    | 0.52               | 0.52                   | 0.52                   | 0.54                   | 0.48                   | 0.52                   | 0.51          | 0.52                   | 0.51                   | 0.50                   |

### 3.5 $A_4$ : the mother starts breastfeeding and continues for the full 3 months

To define this fourth variable we have to model the duration of breastfeeding. We do so in the next section.

## 4 Potential duration of breastfeeding in the first three months

The duration of breastfeeding varies between mothers and depends on education, birth weight, allergy, age of mother, sex of child, caesarean section, and on whether the woman did follow the BEP.

For each subject we started by generating the following two potential breastfeeding durations:

- $D_{\mathbf{a}_2(0), \mathbf{a}_3(1)}$ , the potential breastfeeding duration if a woman had been set to start breastfeeding and not to follow the programme.
- $D_{\mathbf{a}_2(1), \mathbf{a}_3(1)}$ , the potential breastfeeding duration if a woman had been set to start breastfeeding and to follow the programme.

For simplicity, we generated discrete duration variables, with values 0, 1, 2 and 3 months. Therefore we assumed an underlying truncated Poisson model for potential duration:

$$D_{\mathbf{a}_2(a), \mathbf{a}_3(1)} \sim \min(3, \text{Poisson}(\lambda(a)))$$

with  $\lambda(a) = 1.5 + 0.001 \text{ (Wgt0-3000)} + 1.0 \text{ (Educ=2)} + 1.5 \text{ (Educ=3)} + a_2 + 0.5 \text{ Allergy} + 0.05 \text{ Age} - 1.0 \text{ Caesarian} - 0.5 \text{ Sex}$ , with  $a$  the value to which  $A_2$  has been set. In this way following the programme does not only increase the probability of starting breastfeeding, but also increases the duration of breastfeeding if started.

These potential variables can be used to define the potential duration of breastfeeding when assigned to the intervention group:

$$D_{\mathbf{a}_1(1)} = \begin{cases} 0 & \text{if } A_{3, \mathbf{a}_1(1)} = 0 \\ D_{\mathbf{a}_2(1), \mathbf{a}_3(1)} & \text{if } A_{3, \mathbf{a}_1(1)} = 1 \text{ and } A_{2, \mathbf{a}_1(1)} = 1 \\ D_{\mathbf{a}_2(0), \mathbf{a}_3(1)} & \text{if } A_{3, \mathbf{a}_1(1)} = 1 \text{ and } A_{2, \mathbf{a}_1(1)} = 0. \end{cases}$$

The potential duration of breastfeeding when assigned to the control group is:

$$D_{\mathbf{a}_1(0)} = \begin{cases} 0 & \text{if } A_{3, \mathbf{a}_1(0)} = 0 \\ D_{\mathbf{a}_2(0), \mathbf{a}_3(1)} & \text{if } A_{3, \mathbf{a}_1(0)} = 1. \end{cases}$$

The potential duration when assigned to attending the programme (and hence also when assigned to the intervention group) is

$$D_{\mathbf{a}_2(1)} = \begin{cases} 0 & \text{if } A_{3, \mathbf{a}_2(1)} = 0 \\ D_{\mathbf{a}_2(1), \mathbf{a}_3(1)} & \text{if } A_{3, \mathbf{a}_2(1)} = 1 \end{cases}$$

The frequency distribution of the different potential duration variables is given in Table 3.

The actual observed duration of BF and the observed value of  $A_4$ , continuing breastfeeding for the full three months are equal to

- $D = \begin{cases} D_{\mathbf{a}_1(1)} & \text{if } A_1 = 1 \\ D_{\mathbf{a}_1(0)} & \text{if } A_1 = 0 \end{cases}$
- $A_4 = 1$  if  $D \geq 3$  months and 0 otherwise.

Figure 3 illustrates the data generating mechanism for  $D$  and  $A_4$ .

Table 3: True potential duration of breastfeeding under different scenarios, generated as in PROBITsim Study, but with  $N = 5,000,000$

| Duration                              | Scenario                          | Frequency distribution   |      |      |          |
|---------------------------------------|-----------------------------------|--------------------------|------|------|----------|
|                                       |                                   | Months of Breast Feeding |      |      |          |
|                                       |                                   | 0                        | 1    | 2    | $\geq 3$ |
| $D_{\mathbf{a}_1(0)}$                 | No intervention                   | 0.54                     | 0.07 | 0.09 | 0.30     |
| $D_{\mathbf{a}_1(1)}$                 | Intervention offered              | 0.34                     | 0.06 | 0.10 | 0.50     |
| $D_{\mathbf{a}_2(1)}$                 | Programme offered and followed    | 0.22                     | 0.06 | 0.11 | 0.61     |
| $D_{\mathbf{a}_1(0),\mathbf{a}_3(1)}$ | Programme not offered, BF started | 0.07                     | 0.15 | 0.20 | 0.58     |
| $D_{\mathbf{a}_2(1),\mathbf{a}_3(1)}$ | Programme followed, BF started    | 0.02                     | 0.08 | 0.14 | 0.75     |

## 5 Potential outcomes for weight at three months

We generated the potential weight at 3 months ( $Y(\mathfrak{D})$ ) under different potential durations of breastfeeding (D) using a linear regression model that included birth weight and all the other baseline variables, duration of breastfeeding during the first 3 months of life, and an interaction terms between duration of breastfeeding with birth weight, education and maternal smoking, assuming that children with lower birth weight, children of less educated mothers and children with smoking mothers benefited more from breastfeeding. The model for potential birth weight, (in grams), under different set durations of breastfeeding, was specified as follows:

$$E[Y(\mathfrak{D})] = 5800 + (\text{Wgt0-3000}) + 16 (\text{Location}=2) - 20 (\text{Location}=3) - 15 (\text{Location}=4) + 10 (\text{Educ}=2) + 20 (\text{Educ}=3) - 50 \text{ Smoke} - 25 \text{ Allergy} - 10 \text{ Age} - 40 \text{ Caesarian} + 500 \text{ Sex} + 100 \text{ D} + 50 \text{ D} (\text{Educ}=2) + 100 \text{ D} (\text{Educ}=1) - 0.02 \text{ D} (\text{Wgt0-3000}) + 50 \text{ D} \text{ Smoke}$$

where D is the duration of breastfeeding generated under different set values for  $A_1$  and  $A_2$  as described in Section 4. Individual realizations were generated assuming a normal distribution with  $\text{SD}=50\text{g}$  (assumed to have a biological variation of  $\text{sd}=40\text{g}$  and a residual component of  $\text{sd}=10\text{g}$ ).

Since duration of breastfeeding varies according to intervention, uptake of the programme, and uptake of breastfeeding (i.e.  $A_1$ ,  $A_2$  and  $A_3$ ), the potential outcomes under different scenarios that influence duration were calculated. Several potential outcomes  $Y$ . were generated to represent the potential weight at 3 months under different interventions:

- $Y_{\mathbf{a}_3(0)}$ , the potential outcome under a no breastfeeding uptake ( $\text{D}=0$ ).
- $Y_{\mathbf{a}_1(0)}$ , the potential outcome under no BEP intervention (no programme offer).
- $Y_{\mathbf{a}_1(1)}$  the potential outcome under BEP intervention.
- $Y_{\mathbf{a}_2(1)}$  the potential outcome under programme uptake.
- $Y_{\mathbf{a}_1(0),\mathbf{a}_3(1)}$  the potential outcome under a joint intervention where the programme is not offered and breastfeeding is set to start.
- $Y_{\mathbf{a}_1(1),\mathbf{a}_3(1)}$  the potential outcome under a joint intervention where the programme is offered and breastfeeding is set to start.
- $Y_{\mathbf{a}_2(1),\mathbf{a}_3(1)}$  the potential outcome if the programme is actually followed and breastfeeding is started.
- $Y_{\mathbf{a}_4(1)}$ , the potential outcome if breastfeeding is set to last for three months.

The mean and standard deviation of the different potential outcomes at three months in our simulated population are given in Table 4.

Table 4: True potential weight at three months (mean and standard deviation) in the study population under different scenarios, generated as in PROBITsim Study, but with  $N = 5,000,000$ .

| Outcome                               | Scenario                          | Mean | SD  |
|---------------------------------------|-----------------------------------|------|-----|
| $Y_{\mathbf{a}_3(0)}$                 | No BF                             | 5826 | 533 |
| $Y_{\mathbf{a}_1(0)}$                 | intervention is not offered       | 6014 | 592 |
| $Y_{\mathbf{a}_1(1)}$                 | intervention is offered           | 6112 | 591 |
| $Y_{\mathbf{a}_2(1)}$                 | programme is followed             | 6178 | 576 |
| $Y_{\mathbf{a}_1(0),\mathbf{a}_3(1)}$ | no intervention, BF is started    | 6213 | 550 |
| $Y_{\mathbf{a}_1(1),\mathbf{a}_3(1)}$ | intervention, BF is started       | 6248 | 540 |
| $Y_{\mathbf{a}_2(1),\mathbf{a}_3(1)}$ | programme followed, BF is started | 6275 | 528 |
| $Y_{\mathbf{a}_4(1)}$                 | duration BF = 3 months            | 6348 | 497 |

SD: standard deviation

The observed birth weight is generated according to the observed combination of values for  $A_1$ ,  $A_2$ , and  $D$ . Figure 4 illustrates the corresponding data generating mechanism.

## 6 Different causal effects of interest

To explore the effect of different forms of interventions in different sub-populations, we calculated for each potential outcome the weight gain at 3 months, compared to a no breastfeeding scenario. The mean weight gain is calculated in different sub-populations, and results are given in Table 5. The table can be used to calculate all kinds of contrast of interest.

Table 5: Potential weight differences, under different conditions, compared to a no breastfeeding hypothetical intervention, in different populations generated as in PROBITsim Study, but with  $N = 5,000,000$ .

| Outcome                               | Scenario                          | totpop | prog | noprogram | BF.interv | no BF | compliers |
|---------------------------------------|-----------------------------------|--------|------|-----------|-----------|-------|-----------|
| $Y_{\mathbf{a}_3(0)}$                 | No BF                             | 0      | 0    | 0         | 0         | 0     | 0         |
| $Y_{\mathbf{a}_1(0)}$                 | intervention is not offered       | 187    | 195  | 175       | 277       | 0     | 0         |
| $Y_{\mathbf{a}_1(1)}$                 | intervention is offered           | 286    | 348  | 175       | 422       | 163   | 437       |
| $Y_{\mathbf{a}_2(1)}$                 | programme is followed             | 351    | 348  | 355       | 437       | 274   | 437       |
| $Y_{\mathbf{a}_1(0),\mathbf{a}_3(1)}$ | no intervention, BF is started    | 386    | 376  | 406       | 383       | 394   | 384       |
| $Y_{\mathbf{a}_1(1),\mathbf{a}_3(1)}$ | intervention, BF is started       | 421    | 429  | 406       | 422       | 430   | 437       |
| $Y_{\mathbf{a}_2(1),\mathbf{a}_3(1)}$ | programme followed, BF is started | 448    | 429  | 482       | 437       | 463   | 437       |
| $Y_{\mathbf{a}_4(1)}$                 | duration BF = 3 months            | 522    | 493  | 576       | 501       | 546   | 508       |

‘prog’ are women who followed the breastfeeding programme ( $A_2^{obs} = 1$ )

‘noprogram’ are women who received an invitation but did not follow the breastfeeding programme ( $A_2^{obs} = 0$  and  $A_1^{obs} = 1$ )

BF.interv are women who started breastfeeding in the intervention group ( $A_3 = 1$  and  $A_1 = 1$ )

no BF are women who did not start breastfeeding in the control group ( $A_3 = 0$  and  $A_1 = 1$ ) Compliers are women who will start breastfeeding if programme is offered, and not, when it is not offered ( $A_{3,\mathbf{a}_1(1)} = 1$  and  $A_{3,\mathbf{a}_1(0)} = 0$ )

### 6.1 Causal effects in the total population

The true causal effect which would be calculated had this been a randomized clinical trial (intention-to-treat effect), would be  $E[Y_{\mathbf{a}_1(1)} - Y_{\mathbf{a}_1(0)}] = 99$  grams. If everyone were to ac-



tually follow the programme the difference would be  $E[Y_{\mathbf{a}_2(1)} - Y_{\mathbf{a}_1(0)}] = 164$  grams. If the programme were offered to everyone and everyone started breastfeeding, the difference, relative to no programme, would be  $E[Y_{\mathbf{a}_1(1), \mathbf{a}_3(1)} - Y_{\mathbf{a}_1(0)}] = 234$  grams. If everyone were to follow the programme and all started breastfeeding this would be  $E[Y_{\mathbf{a}_2(1), \mathbf{a}_3(1)} - Y_{\mathbf{a}_1(0)}] = 261$  grams, a slightly larger effect because the programme increases the mean duration of breastfeeding. Had everybody started breastfeeding, without following the programme, the increase in weight would be  $E[Y_{\mathbf{a}_1(0), \mathbf{a}_3(1)} - Y_{\mathbf{a}_1(0)}] = 199$  grams. The difference compared to the situation where no one would start breastfeeding is  $E[Y_{\mathbf{a}_1(1), \mathbf{a}_3(1)} - Y_{\mathbf{a}_3(0)}] = 421$  grams.

Some of the causal effects described above are not very realistic. Not every woman would be able to start breastfeeding. For example when a mother becomes very ill at the end of pregnancy, breastfeeding her baby may not be an option because of toxicity of prescribed medication or poor health. Assuming that every woman would continue breastfeeding for 3 months is even more unlikely.

This shows that some of the causal effects which may be estimable are unrealistic large. In our example the largest causal contrast is the expected weight difference when every infant versus none is breastfed for 3 months, which is equal to  $E[Y_{\mathbf{a}_4(1)} - Y_{\mathbf{a}_3(0)}] = 522$  grams.

## 6.2 Causal effects in sub-populations

In our example the “average treatment effect in the treated (ATT)” can be defined in different ways. “Treated” could mean actually following the programme, if offered. In this case the effect of attending the programme is  $ATT = E[Y_{\mathbf{a}_2(1)} - Y_{\mathbf{a}_1(0)} | A_2 = 1] = 153$  grams. The corresponding Average Treatment effect among the non Treated then is  $ATNT = E[Y_{\mathbf{a}_2(1)} - Y_{\mathbf{a}_1(0)} | A_2 = 0 \text{ and } A_1 = 1] = 180$  grams. Alternatively, treated could mean being breastfed in which case the ATT is the effect of breastfeeding in those who actually start breastfeeding:  $E[Y_{\mathbf{a}_3(1), \mathbf{a}_1(1)} - Y_{\mathbf{a}_3(0)} | A_3 = 1] = 417$  grams and the ATNT is  $E[Y_{\mathbf{a}_3(1), \mathbf{a}_1(1)} - Y_{\mathbf{a}_3(0)} | A_3 = 0] = 426$  grams.

Another local effect which may be of interest is the CACE, the Complier Average Causal Effect. The CACE for the BEP intervention is  $CACE = E[Y_{\mathbf{a}_1(1)} - Y_{\mathbf{a}_1(0)} | A_{3, \mathbf{a}_1(1)} = 1 \text{ and } A_{3, \mathbf{a}_1(0)} = 0] = 437$  grams. In our study, the CACE represents the effect of the programme in the subgroup of individuals whose decision to start breastfeeding depends on allocation to the BEP programme.

When implementing an intervention, it is of interest to identify those subgroups for which the intervention is most beneficial. Table 6 shows for example that infants of less educated women will profit more than those of more educated women, both when the programme is offered and when the programme is actually followed.

Table 6: Potential weight differences under different scenarios compared to no BEP programme, in sub-populations, calculated from data generated as in PROBITsim Study, but with  $N = 5,000,000$ .

| Outcome                                | Scenario                          | Education |        |      | Smoking |     |
|----------------------------------------|-----------------------------------|-----------|--------|------|---------|-----|
|                                        |                                   | low       | medium | high | yes     | no  |
| $Y_{\mathbf{a}_3(0)}$                  | No BF                             | 0         | 0      | 0    | 0       | 0   |
| $Y_{\mathbf{a}_1(0)}$                  | intervention is not offered       | 185       | 198    | 154  | 181     | 190 |
| $Y_{\mathbf{a}_1(1)}$                  | intervention is offered           | 296       | 297    | 223  | 279     | 289 |
| $Y_{\mathbf{a}_2(1)}$                  | programme is followed             | 395       | 351    | 242  | 401     | 333 |
| $Y_{\mathbf{a}_1(0), \mathbf{a}_3(1)}$ | no intervention, BF is started    | 425       | 393    | 262  | 470     | 355 |
| $Y_{\mathbf{a}_1(1), \mathbf{a}_3(1)}$ | intervention, BF is started       | 477       | 420    | 281  | 507     | 389 |
| $Y_{\mathbf{a}_2(1), \mathbf{a}_3(1)}$ | programme followed, BF is started | 528       | 436    | 285  | 564     | 405 |
| $Y_{\mathbf{a}_4(1)}$                  | duration BF = 3 months            | 663       | 483    | 302  | 680     | 463 |

## 7 Variables in the dataset

Our simulated dataset of 17044 women contains the following variables:

---

|                   |                                                                                                                               |
|-------------------|-------------------------------------------------------------------------------------------------------------------------------|
| A1                | Randomisation; A1=1 is intervention, A1=0 is control                                                                          |
| A2.observed       | Followed the intervention programme (1=yes, 0 = no)                                                                           |
| Location          | location of living. (1: urban western region, 2: rural western region, 3: urban, eastern region and 4: rural, eastern region) |
| Age               | Age of women at randomisation                                                                                                 |
| Educ              | Education level 1=low, 2=medium, 3=high                                                                                       |
| Smoke             | Smoking during pregnancy (1=yes, 0 = no)                                                                                      |
| Allergy           | Maternal allergy. (1=yes, 0 = no)                                                                                             |
| Caesarean         | Child born by Caesarian (1=yes, 0 = no)                                                                                       |
| Wgt0              | Birth weight in grams                                                                                                         |
| Sex               | Sex of child, (1=boy, 0 = girl)                                                                                               |
| A3.observed       | Breastfeeding started (1=yes, 0 = no)                                                                                         |
| dur.observed      | Duration of breastfeeding in the first three months                                                                           |
| A4.observed       | Completed 3 months of breastfeeding(1=yes, 0 = no)                                                                            |
| Wgt3.observed     | Weight of child after 3 months                                                                                                |
| A2potential       | The women follows the programme if it is offered (yes/no)                                                                     |
| A3pot.A1.0        | The women will start breastfeeding, if no intervention is given (yes/no)                                                      |
| A3pot.A1.1        | The women will start breastfeeding, if intervention is given (yes/no)                                                         |
| A3pot.A1.1.A2.1.  | The women will start breastfeeding, after following the programme (yes/no)                                                    |
| durpot.A1.0       | Potential duration of breastfeeding, under no intervention                                                                    |
| durpot.A1.1       | Potential duration of breastfeeding, under intervention                                                                       |
| durpot.A1.1.A2.1  | Potential duration of breastfeeding, when programme is followed                                                               |
| durpot.A1.0.A3.1  | Potential duration of breastfeeding, under no intervention, but breastfeeding is started                                      |
| durpot.A2.1.A3.1  | Potential duration of breastfeeding, when programme is followed and breast-feeding is started                                 |
| durpot.A2pot.A3.1 | Potential duration of breastfeeding, when intervention is given and breast-feeding is started                                 |
| Wgt3pot.A1.0      | Potential weight at 3 months under no intervention                                                                            |
| Wgt3pot.A1.1      | Potential weight at 3 months under intervention                                                                               |
| Wgt3pot.A2.1      | Potential weight at 3 months after following programme                                                                        |
| Wgt3pot.A1.0.A3.1 | Potential weight at 3 months under no intervention but breastfeeding is started.                                              |
| Wgt3pot.A1.1.A3.1 | Potential weight at 3 months under intervention and breastfeeding is started                                                  |
| Wgt3pot.A2.1.A3.1 | Potential weight at 3 months when programme is followed and breastfeeding is started                                          |
| Wgt3pot.dur0      | Potential weight at 3 months when breastfeeding duration = 0 months                                                           |
| Wgt3pot.dur1      | Potential weight at 3 months when breastfeeding duration = 1 months                                                           |
| Wgt3pot.dur2      | Potential weight at 3 months when breastfeeding duration = 2 months                                                           |
| Wgt3pot.dur3      | Potential weight at 3 months when breastfeeding duration = 3 months                                                           |

---

Figure 2: Data generating model for  $A_2$  and  $A_3$  in terms of  $A_1$ ,  $L_1$  and  $L_2$

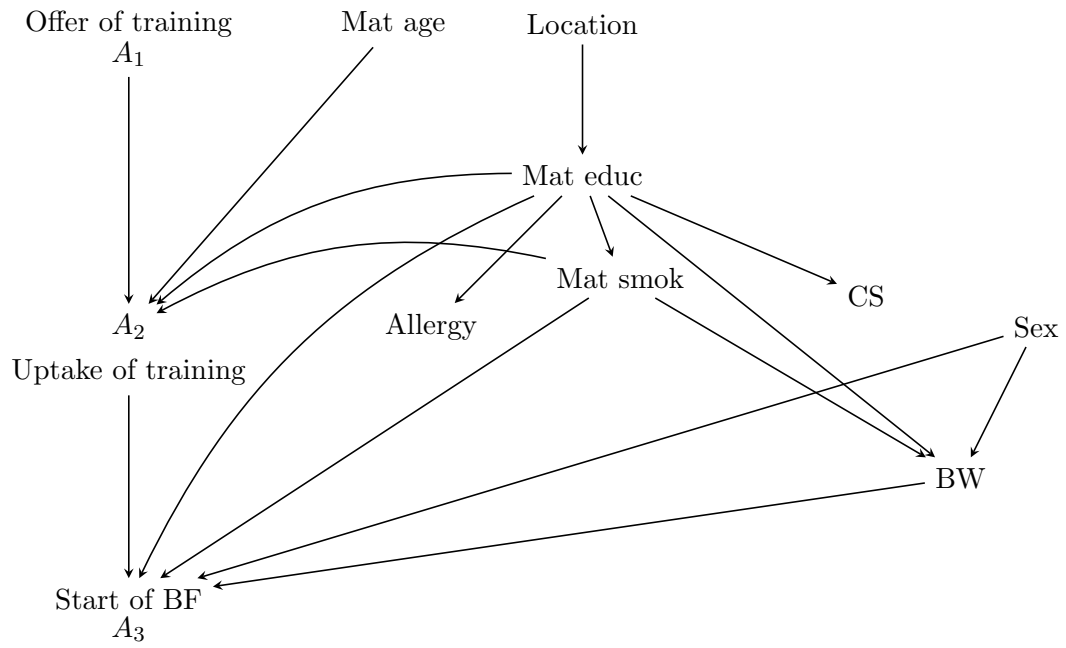

BF: breastfeeding; BW: birth weight; CS: caesarian section;

$L_1$ : maternal age, education, smoking during pregnancy;  $L_2$ : birth weight and sex of the baby

Figure 3: Data generating model for  $A_4$  in terms of  $A_1$ ,  $L_1$  and  $L_2$

†.

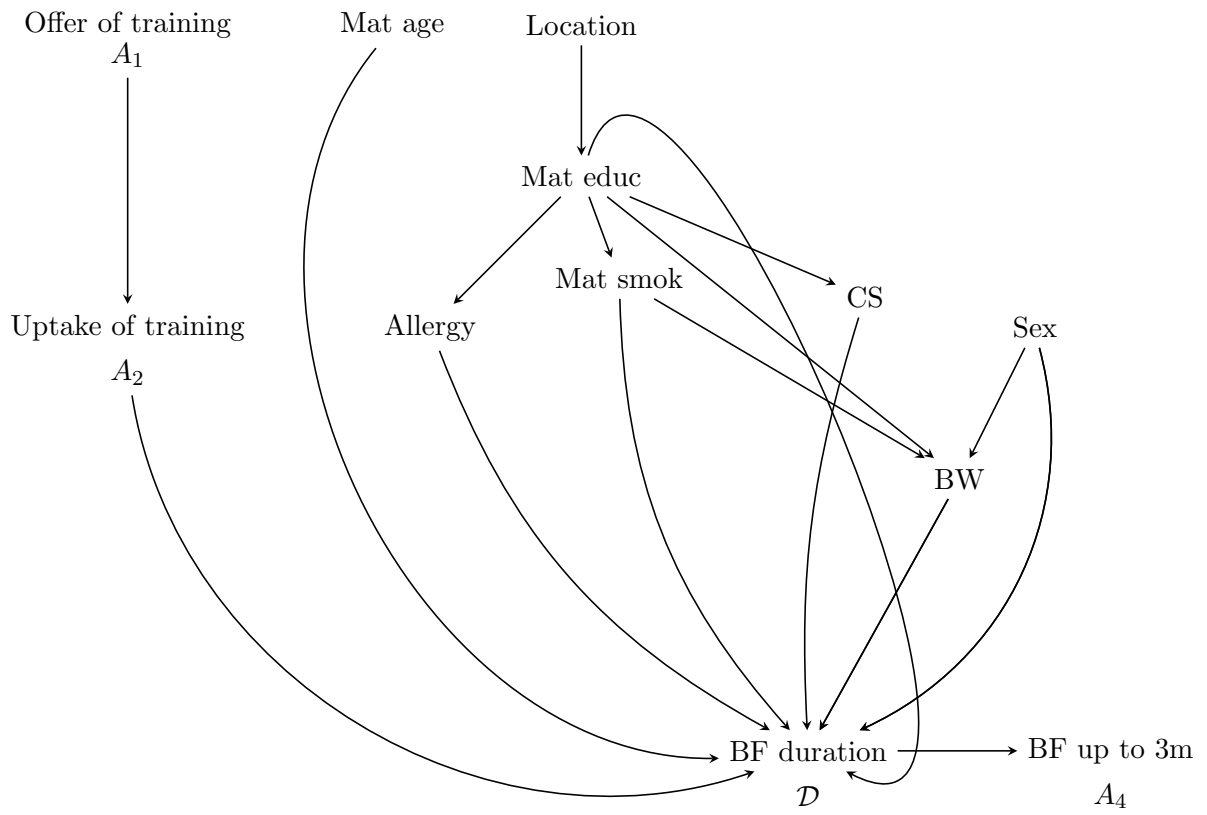

†  $A_3$  is not depicted as it is part of  $\mathcal{D}$

BF: breastfeeding; BW: birth weight; CS: caesarian section

$L_1$ : maternal age, education, smoking during pregnancy;  $L_2$ : birth weight and sex of the baby

Figure 4: Data generating model for infant weight at 3 months in terms of  $A_1$ ,  $A_2$ ,  $L_1$  and  $L_2$  <sup>†</sup>

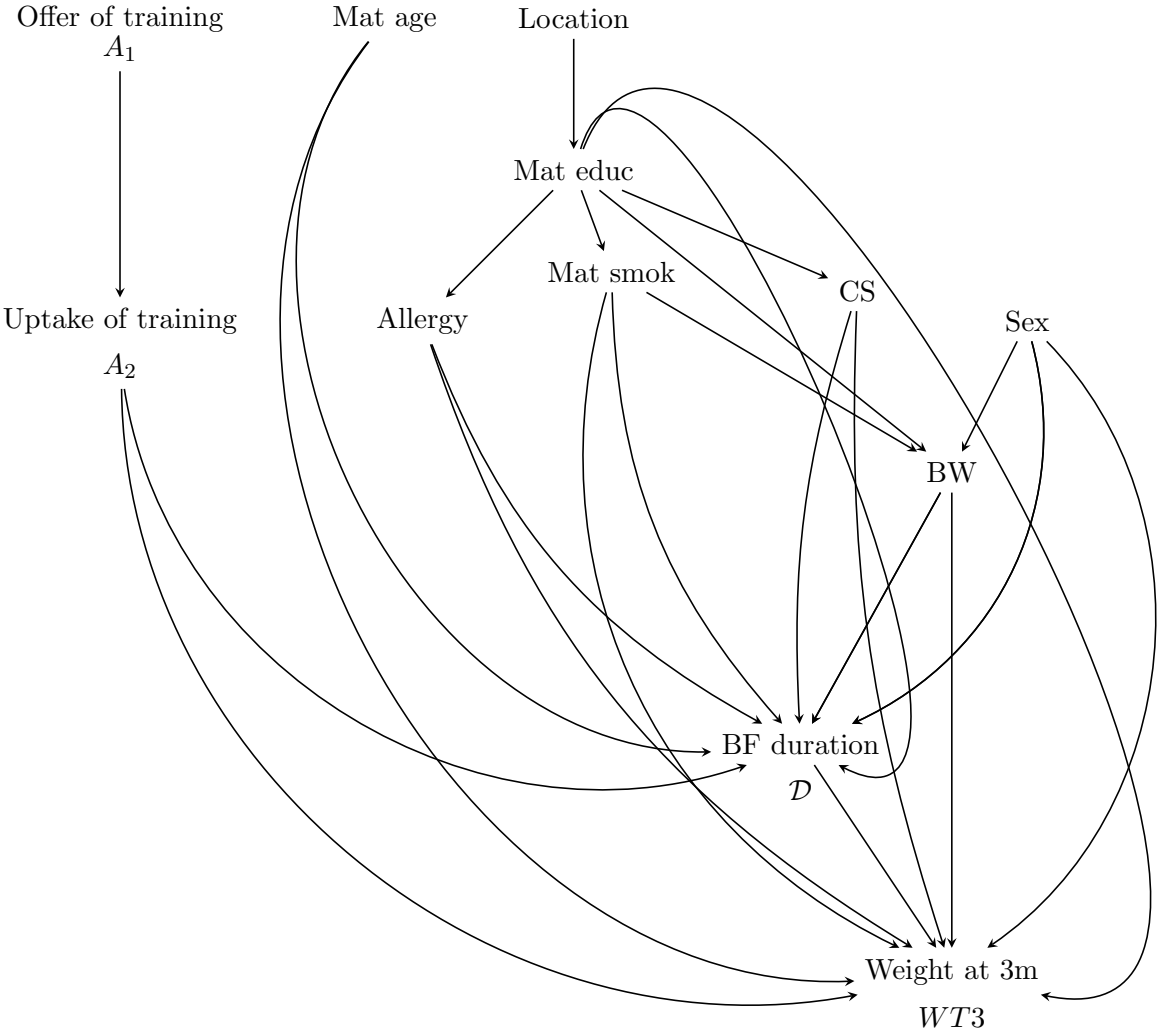

<sup>†</sup>  $A_3$  is not depicted as it is part of  $\mathcal{D}$

BF: breastfeeding; BW: birth weight; CS: caesarian section

$L_1$ : maternal age, education, smoking during pregnancy;  $L_2$ : birth weight and sex of the baby
